# Supplementary material for: Efficient Matrix Cleanup of Soft-Gel-Type Dietary Supplements for Rapid Screening of 92 Illegal Adulterants Using EMR-Lipid dSPE and UHPLC-Q/TOF-MS
Source: MDPI journal article supplement (doi:10.3390/ph14060570), 2021-06-15
Supplement: s1 [file s1]

**Supplementary Table S1. Penalty points for screening of 92 illegal adulterants in soft-gel-type dietary supplements using QuEChERS, EMR-Lipid, and DLLME followed by UHPLC-Q/TOF-MS.**

|                                  | Penalty points |           |       |
|----------------------------------|----------------|-----------|-------|
|                                  | QuEChERS       | EMR-Lipid | DLLME |
| <b>Reagents</b>                  |                |           |       |
| Acetonitrile                     | 8              | 4         | 4     |
| formic acid                      | 1              |           |       |
| MgSO <sub>4</sub>                | 0              |           |       |
| NaCl                             | 0              |           |       |
| PSA                              | 2              |           |       |
| GCB                              | 1              |           |       |
| C18                              | 0              |           |       |
| EMR-Lipid material kit           |                | 0         |       |
| De-ionized water                 |                | 0         |       |
| Chloroform                       |                |           | 3     |
| <b>Instruments</b>               |                |           |       |
| Energy                           |                |           |       |
| Ultrasonic                       | 0              | 0         | 0     |
| Vortex                           | 0              | 0         | 0     |
| Centrifuge                       | 2              | 2         | 2     |
| LC-Q/TOF-MS                      | 3              | 3         | 3     |
| Occupation hazard                | 0              | 0         | 0     |
| Waste                            |                |           |       |
| 1 - 10 mL (g)                    | 3              | 3         | 3     |
| Recycling                        | 0              | 0         | 0     |
| Total penalty points             | 25             | 17        | 20    |
| Analytical Eco-scale total score | 75             | 83        | 80    |

According to Gałuszka et al. (2012).

PSA, primary secondary amine; GCB, graphitized carbon black

**Supplementary Table S2. Retention times, molecular formulae, and accurate mass measurements of 92 illegal adulterants obtained by UHPLC-Q/TOF-MS.**

| No. | Analyte                   | RT (min) | Molecular formula                                               | Theoretical m/z ion (Da) | Error (ppm) |
|-----|---------------------------|----------|-----------------------------------------------------------------|--------------------------|-------------|
| 1   | Metformin                 | 1.24     | C <sub>4</sub> H <sub>11</sub> N <sub>5</sub>                   | 130.1087                 | 3.23        |
| 2   | Amiloride HCl             | 1.34     | C <sub>6</sub> H <sub>8</sub> ClN <sub>7</sub> O                | 230.0552                 | 0.71        |
| 3   | 4-Dimethylaminoantipyrine | 1.37     | C <sub>13</sub> H <sub>17</sub> N <sub>3</sub> O                | 232.1444                 | -0.27       |
| 4   | Theophylline              | 1.38     | C <sub>7</sub> H <sub>8</sub> N <sub>4</sub> O <sub>2</sub>     | 181.0720                 | 0.55        |
| 5   | Ephedrine HCl             | 1.43     | C <sub>10</sub> H <sub>15</sub> NO                              | 166.1227                 | -2.75       |
| 6   | Acetaminophen             | 1.54     | C <sub>8</sub> H <sub>9</sub> NO <sub>2</sub>                   | 152.0706                 | 3.96        |
| 7   | Triamterene               | 1.57     | C <sub>12</sub> H <sub>11</sub> N <sub>7</sub>                  | 254.1149                 | -2.01       |
| 8   | Captopril                 | 2.00     | C <sub>9</sub> H <sub>15</sub> NO <sub>3</sub> S                | 218.0846                 | 2.42        |
| 9   | Yohimbin                  | 2.27     | C <sub>21</sub> H <sub>26</sub> N <sub>2</sub> O <sub>3</sub>   | 355.2016                 | 2.04        |
| 10  | Hydroxywardenafil         | 2.35     | C <sub>23</sub> H <sub>32</sub> N <sub>6</sub> O <sub>5</sub> S | 505.2228                 | 1.33        |
| 11  | Thioquinapiperifil        | 2.39     | C <sub>24</sub> H <sub>28</sub> N <sub>6</sub> OS               | 449.2118                 | 1.56        |
| 12  | Bambuterol                | 2.54     | C <sub>18</sub> H <sub>29</sub> N <sub>3</sub> O <sub>5</sub>   | 368.2180                 | 0.58        |
| 13  | Vardenafil                | 2.62     | C <sub>23</sub> H <sub>32</sub> N <sub>6</sub> O <sub>4</sub> S | 489.2279                 | 0.12        |
| 14  | Carbodenafil              | 2.71     | C <sub>24</sub> H <sub>32</sub> N <sub>6</sub> O <sub>3</sub>   | 453.2609                 | 1.70        |
| 15  | Brompheniramine           | 2.99     | C <sub>16</sub> H <sub>19</sub> BrN <sub>2</sub>                | 319.0804                 | 0.19        |
| 16  | Bupropion HCl             | 3.08     | C <sub>13</sub> H <sub>18</sub> ClNO                            | 240.1150                 | -4.67       |
| 17  | Triprolidine              | 3.16     | C <sub>19</sub> H <sub>22</sub> N <sub>2</sub>                  | 279.1856                 | 3.49        |
| 18  | Norneovardenafil          | 3.25     | C <sub>18</sub> H <sub>20</sub> N <sub>4</sub> O <sub>4</sub>   | 357.1577                 | 2.32        |
| 19  | Hongdenafil               | 3.43     | C <sub>25</sub> H <sub>34</sub> N <sub>6</sub> O <sub>3</sub>   | 467.2765                 | 0.88        |
| 20  | Dimethylacetildenafil     | 3.54     | C <sub>25</sub> H <sub>34</sub> N <sub>6</sub> O <sub>3</sub>   | 467.2765                 | 1.35        |
| 21  | Ketotifen fumarate salt   | 3.61     | C <sub>19</sub> H <sub>19</sub> NOS                             | 310.1260                 | 1.62        |
| 22  | Icariin                   | 3.63     | C <sub>33</sub> H <sub>40</sub> O <sub>15</sub>                 | 677.2440                 | -0.41       |
| 23  | Astemizole                | 3.73     | C <sub>28</sub> H <sub>31</sub> FN <sub>4</sub> O               | 459.2555                 | 0.78        |
| 24  | Propranolol               | 3.85     | C <sub>16</sub> H <sub>21</sub> NO <sub>2</sub>                 | 260.1645                 | 0.45        |
| 25  | Modafinil                 | 3.86     | C <sub>15</sub> H <sub>15</sub> NO <sub>2</sub> S               | 296.0716                 | 0.89        |
| 26  | Oxohongdenafil            | 3.97     | C <sub>25</sub> H <sub>32</sub> N <sub>6</sub> O <sub>4</sub>   | 481.2558                 | -0.22       |
| 27  | Olopatadine               | 4.00     | C <sub>21</sub> H <sub>23</sub> NO <sub>3</sub>                 | 338.1751                 | 1.42        |
| 28  | Sildenafil                | 4.31     | C <sub>22</sub> H <sub>30</sub> N <sub>6</sub> O <sub>4</sub> S | 475.2122                 | -1.09       |
| 29  | Avanafil                  | 4.42     | C <sub>23</sub> H <sub>26</sub> ClN <sub>7</sub> O <sub>3</sub> | 484.1858                 | 1.15        |
| 30  | Dimethylsildenafil        | 4.51     | C <sub>23</sub> H <sub>32</sub> N <sub>6</sub> O <sub>4</sub> S | 489.2279                 | -0.08       |
| 31  | Diphenhydramine           | 4.57     | C <sub>17</sub> H <sub>21</sub> NO                              | 256.1696                 | 2.00        |
| 32  | Methylprednisolone        | 4.90     | C <sub>22</sub> H <sub>30</sub> O <sub>5</sub>                  | 375.2166                 | 1.35        |
| 33  | Carbamazepine             | 4.90     | C <sub>15</sub> H <sub>12</sub> N <sub>2</sub> O                | 237.1023                 | -0.28       |
| 34  | Dimenhydrinate            | 5.07     | C <sub>17</sub> H <sub>21</sub> NO                              | 256.1696                 | -2.05       |
| 35  | Betamethasone             | 5.15     | C <sub>22</sub> H <sub>29</sub> FO <sub>5</sub>                 | 393.2072                 | -0.30       |
| 36  | Eplerenone                | 5.16     | C <sub>24</sub> H <sub>30</sub> O <sub>6</sub>                  | 415.2115                 | 1.23        |
| 37  | Acetaminotadalafil        | 5.17     | C <sub>23</sub> H <sub>20</sub> N <sub>4</sub> O <sub>5</sub>   | 433.1506                 | 0.79        |
| 38  | Dexamethasone             | 5.25     | C <sub>22</sub> H <sub>29</sub> FO <sub>5</sub>                 | 393.2072                 | 0.49        |
| 39  | Udenafil                  | 5.29     | C <sub>25</sub> H <sub>36</sub> N <sub>6</sub> O <sub>4</sub> S | 517.2592                 | -0.30       |
| 40  | Promethazine              | 5.33     | C <sub>17</sub> H <sub>20</sub> N <sub>2</sub> S                | 285.1420                 | 3.87        |
| 41  | Demethyltadalafil         | 5.38     | C <sub>21</sub> H <sub>17</sub> N <sub>3</sub> O <sub>4</sub>   | 376.1292                 | 4.48        |
| 42  | Piroxicam                 | 5.39     | C <sub>15</sub> H <sub>13</sub> N <sub>3</sub> O <sub>4</sub> S | 332.0700                 | 3.16        |
| 43  | Paroxetine                | 5.48     | C <sub>19</sub> H <sub>20</sub> FN <sub>2</sub> O <sub>3</sub>  | 330.1500                 | -2.15       |
| 44  | Beclomethasone            | 5.50     | C <sub>22</sub> H <sub>29</sub> ClO <sub>5</sub>                | 409.1776                 | -1.42       |
| 45  | 4-Isopropylantipyrine     | 5.60     | C <sub>14</sub> H <sub>18</sub> N <sub>2</sub> O                | 231.1492                 | 0.84        |
| 46  | Phenolphthalein           | 5.63     | C <sub>20</sub> H <sub>14</sub> O <sub>4</sub>                  | 319.0965                 | -0.69       |
| 47  | Ketorolac                 | 5.79     | C <sub>15</sub> H <sub>13</sub> NO <sub>3</sub>                 | 256.0968                 | 1.21        |
| 48  | Flunisolide               | 5.96     | C <sub>24</sub> H <sub>31</sub> FO <sub>6</sub>                 | 435.2177                 | 1.50        |
| 49  | Sulindac                  | 5.97     | C <sub>20</sub> H <sub>17</sub> FO <sub>3</sub> S               | 357.0955                 | -0.80       |
| 50  | Cyproheptadine            | 6.07     | C <sub>21</sub> H <sub>21</sub> N                               | 288.1747                 | 1.33        |
| 51  | Levothyroxine             | 6.07     | C <sub>15</sub> H <sub>11</sub> I <sub>4</sub> NO <sub>4</sub>  | 777.694                  | 1.01        |
| 52  | Bisacodyl                 | 6.1      | C <sub>22</sub> H <sub>19</sub> NO <sub>4</sub>                 | 362.1387                 | -0.91       |
| 53  | Boldenone                 | 6.19     | C <sub>19</sub> H <sub>26</sub> O <sub>2</sub>                  | 287.2006                 | 6.13        |
| 54  | Desulfovardenafil         | 6.33     | C <sub>17</sub> H <sub>20</sub> N <sub>4</sub> O <sub>2</sub>   | 313.1659                 | 2.27        |
| 55  | Benzylsildenafil          | 6.44     | C <sub>28</sub> H <sub>34</sub> N <sub>6</sub> O <sub>4</sub> S | 551.2435                 | -0.38       |
| 56  | Xanthoanthrafil           | 6.44     | C <sub>19</sub> H <sub>23</sub> N <sub>3</sub> O <sub>6</sub>   | 390.166                  | 0.95        |
| 57  | Didesmethylsibutramine    | 6.58     | C <sub>15</sub> H <sub>22</sub> ClN                             | 252.1514                 | -2.19       |
| 58  | Prednisone-21-acetate     | 6.68     | C <sub>23</sub> H <sub>28</sub> O <sub>6</sub>                  | 401.1959                 | 0.18        |
| 59  | Fexofenadine              | 6.71     | C <sub>32</sub> H <sub>39</sub> NO <sub>4</sub>                 | 502.2952                 | -2.24       |
| 60  | Fluoxetine HCl            | 6.72     | C <sub>17</sub> H <sub>18</sub> F <sub>3</sub> NO               | 310.1414                 | 1.06        |

**Supplementary Table S2. (continued)**

| No. | Analyte                         | RT (min) | Molecular formula                                                            | Theoretical m/z ion (Da) | Error (ppm) |
|-----|---------------------------------|----------|------------------------------------------------------------------------------|--------------------------|-------------|
| 61  | Dapoxetine                      | 6.77     | C <sub>21</sub> H <sub>23</sub> NO                                           | 306.1852                 | 0.15        |
| 62  | Mirodenafil                     | 6.77     | C <sub>26</sub> H <sub>37</sub> N <sub>5</sub> O <sub>5</sub> S              | 532.2588                 | 3.60        |
| 63  | Prednisolone-21-acetate         | 6.77     | C <sub>23</sub> H <sub>30</sub> O <sub>6</sub>                               | 403.2115                 | 2.50        |
| 64  | Beclomethasone-21-hemisuccinate | 6.78     | C <sub>26</sub> H <sub>33</sub> ClO <sub>8</sub>                             | 509.1937                 | 3.11        |
| 65  | Cortisone-21-acetate            | 6.78     | C <sub>23</sub> H <sub>30</sub> O <sub>6</sub>                               | 403.2115                 | 0.30        |
| 66  | Sibutramine                     | 7.10     | C <sub>17</sub> H <sub>26</sub> ClN                                          | 280.1827                 | -1.60       |
| 67  | Sertraline HCl                  | 7.10     | C <sub>17</sub> H <sub>17</sub> Cl <sub>2</sub> N                            | 306.0811                 | -2.60       |
| 68  | Homotadalafil                   | 7.11     | C <sub>23</sub> H <sub>21</sub> N <sub>3</sub> O <sub>4</sub>                | 404.1605                 | 2.00        |
| 69  | Boldione                        | 7.15     | C <sub>19</sub> H <sub>24</sub> O <sub>2</sub>                               | 285.1849                 | -4.17       |
| 70  | Meloxicam                       | 7.40     | C <sub>14</sub> H <sub>13</sub> N <sub>3</sub> O <sub>4</sub> S <sub>2</sub> | 352.0421                 | 0.69        |
| 71  | Mibolerone                      | 7.90     | C <sub>20</sub> H <sub>30</sub> O <sub>2</sub>                               | 303.2319                 | 0.55        |
| 72  | Danazol (M)                     | 8.00     | C <sub>21</sub> H <sub>28</sub> O <sub>2</sub>                               | 313.2162                 | 0.01        |
| 73  | Chlorosibutramine               | 8.24     | C <sub>17</sub> H <sub>25</sub> Cl <sub>2</sub> N                            | 314.1437                 | 1.55        |
| 74  | Spironolactone                  | 8.30     | C <sub>24</sub> H <sub>32</sub> O <sub>4</sub> S                             | 341.2111                 | 0.30        |
| 75  | Fluocinonide                    | 8.83     | C <sub>26</sub> H <sub>32</sub> F <sub>2</sub> O <sub>7</sub>                | 495.2189                 | -1.48       |
| 76  | Calusterone                     | 8.85     | C <sub>21</sub> H <sub>32</sub> O <sub>2</sub>                               | 317.2475                 | 0.03        |
| 77  | Clostebol                       | 8.98     | C <sub>19</sub> H <sub>27</sub> ClO <sub>2</sub>                             | 323.1772                 | -1.16       |
| 78  | Cyclopentyltadalafil            | 9.01     | C <sub>26</sub> H <sub>25</sub> N <sub>3</sub> O <sub>4</sub>                | 444.1918                 | 1.79        |
| 79  | Chloropretadalafil              | 9.28     | C <sub>22</sub> H <sub>19</sub> ClN <sub>2</sub> O <sub>5</sub>              | 427.1055                 | -3.71       |
| 80  | Betamethasone-17-valerate       | 9.50     | C <sub>27</sub> H <sub>37</sub> FO <sub>6</sub>                              | 477.2647                 | -1.08       |
| 81  | Diclofenac                      | 9.51     | C <sub>14</sub> H <sub>11</sub> Cl <sub>2</sub> NO <sub>2</sub>              | 296.0240                 | 1.60        |
| 82  | Indomethacin                    | 9.52     | C <sub>19</sub> H <sub>16</sub> ClNO <sub>4</sub>                            | 358.0841                 | 3.54        |
| 83  | Acceclofenac                    | 9.67     | C <sub>16</sub> H <sub>13</sub> Cl <sub>2</sub> NO <sub>4</sub>              | 354.0295                 | -2.47       |
| 84  | Imidazosagatriazinone           | 9.95     | C <sub>17</sub> H <sub>20</sub> N <sub>4</sub> O <sub>2</sub>                | 313.1659                 | 0.31        |
| 85  | Terfenadine                     | 10.15    | C <sub>32</sub> H <sub>41</sub> NO <sub>2</sub>                              | 472.321                  | 0.42        |
| 86  | Phenylbutazone                  | 10.16    | C <sub>19</sub> H <sub>20</sub> N <sub>2</sub> O <sub>2</sub>                | 309.1598                 | 2.46        |
| 87  | Norbolethone                    | 10.24    | C <sub>21</sub> H <sub>32</sub> O <sub>2</sub>                               | 317.2475                 | 0.38        |
| 88  | Betamethasone-21-valerate       | 10.35    | C <sub>27</sub> H <sub>37</sub> FO <sub>6</sub>                              | 477.2647                 | 0.18        |
| 89  | Betamethasone dipropionate      | 10.54    | C <sub>28</sub> H <sub>37</sub> FO <sub>7</sub>                              | 505.2596                 | -0.60       |
| 90  | Beclomethasone dipropionate     | 11.00    | C <sub>28</sub> H <sub>37</sub> ClO <sub>7</sub>                             | 521.2301                 | -1.79       |
| 91  | Rimonabant                      | 12.24    | C <sub>21</sub> H <sub>32</sub> O <sub>2</sub>                               | 463.0854                 | 0.39        |
| 92  | Testosterone-17-propionate      | 12.90    | C <sub>22</sub> H <sub>32</sub> O <sub>3</sub>                               | 345.2424                 | -1.70       |
